# Supplementary material
Source: PubMed Central journal article supplement (PMC521974)
Supplement: pnas_101_40_14509__1.pdf [file pnas_101_40_14509__1.pdf]

Table 1. Expression Profile of E13.5 Genes

| No. | gene name                                                                                         | abbreviated name | GenBank No. | category                                | ratio (P2/E13.5) | E13.5             |        |        |                   | P2     |        |  |
|-----|---------------------------------------------------------------------------------------------------|------------------|-------------|-----------------------------------------|------------------|-------------------|--------|--------|-------------------|--------|--------|--|
|     |                                                                                                   |                  |             |                                         |                  | ratio (CR/non-CR) | signal |        | ratio (CR/non-CR) | signal |        |  |
|     |                                                                                                   |                  |             |                                         |                  |                   | CR     | non-CR |                   | CR     | non-CR |  |
| 1   | BTB and CNC homology 2                                                                            | Bach2            | AW553304    | transcription regulator/nuclear protein | 0.01             | 0.59              | 1191   | 2021   | 0.01              | 5      | 842    |  |
| 2   | B-cell leukemia/lymphoma 11B                                                                      | Bcl11b           | NM_021399   | transcription regulator/nuclear protein | 0.01             | 0.97              | 3143   | 3234   | 0.02              | 12     | 593    |  |
| 3   | cellular retinoic acid binding protein II                                                         | Crabp2           | BC018397    | transcription regulator/nuclear protein | 0.01             | 2.3               | 2400   | 1035   | 1.2               | 12     | 10     |  |
| 4   | neurogenic differentiation 1                                                                      | NeuroD           | AK005073    | transcription regulator/nuclear protein | 0.03             | 0.50              | 1724   | 3436   | 0.07              | 51     | 691    |  |
| 5   | cyclin D2                                                                                         | Ccnd2            | NM_009829   | transcription regulator/nuclear protein | 0.05             | 0.56              | 5978   | 10648  | 0.05              | 271    | 5302   |  |
| 6   | SRY-box containing gene 4                                                                         | Sox4             | NM_009238   | transcription regulator/nuclear protein | 0.08             | 0.71              | 3689   | 5230   | 0.09              | 275    | 3049   |  |
| 7   | SWI/SNF related, matrix associated, actin dependent regulator of chromatin, subfamily d, member 3 | Smardc3          | NM_025891   | transcription regulator/nuclear protein | 0.08             | 1.6               | 2059   | 1256   | 0.18              | 156    | 853    |  |
| 8   | represso                                                                                          | Reprimo          | NM_023396   | transcription regulator/nuclear protein | 0.09             | 0.28              | 1557   | 5501   | 0.06              | 133    | 2067   |  |
| 9   | SWI/SNF related, matrix associated, actin dependent regulator of chromatin, subfamily b, member 1 | Smarb1           | AV310148    | transcription regulator/nuclear protein | 0.10             | 4.3               | 1655   | 389    | 0.55              | 167    | 303    |  |
| 10  | enhancer of zeste homolog 2                                                                       | Ezh2             | NM_007971   | transcription regulator/nuclear protein | 0.11             | 0.53              | 2086   | 3975   | 0.14              | 225    | 1582   |  |
| 11  | LIM homeobox protein 9                                                                            | Lhx9             | NM_010714   | transcription regulator/nuclear protein | 0.12             | 4.1               | 2082   | 512    | 2.8               | 235    | 85     |  |
| 12  | growth arrest and DNA-damage-inducible 45 gamma                                                   | Gadd45g          | AK007410    | transcription regulator/nuclear protein | 0.12             | 0.94              | 4481   | 4749   | 0.97              | 532    | 549    |  |
| 13  | minichromosome maintenance deficient 2 mitotin                                                    | Mcm2             | BB699415    | transcription regulator/nuclear protein | 0.14             | 1.1               | 1812   | 1685   | 0.21              | 238    | 1159   |  |
| 14  | chromodomain helicase DNA binding protein 4                                                       | Chd4             | BM502696    | transcription regulator/nuclear protein | 0.14             | 0.36              | 1162   | 854    | 0.39              | 157    | 408    |  |
| 15  | ecomesoderm homolog                                                                               | Eomes            | BB128925    | transcription regulator/nuclear protein | 0.14             | 0.29              | 1126   | 3868   | 0.18              | 156    | 853    |  |
| 16  | ectodermal-neural cortex 1                                                                        | Enc1             | BM120053    | transcription regulator/nuclear protein | 0.15             | 0.43              | 4527   | 10494  | 0.06              | 668    | 11798  |  |
| 17  | RNA binding motif protein 14                                                                      | Rbm14            | BB730281    | transcription regulator/nuclear protein | 0.17             | 0.91              | 1555   | 1712   | 0.23              | 258    | 1123   |  |
| 18  | mini chromosome maintenance deficient 7                                                           | Mcm7             | BB464359    | transcription regulator/nuclear protein | 0.18             | 0.54              | 5293   | 9749   | 0.22              | 898    | 4054   |  |
| 19  | cyclin-dependent kinase 4                                                                         | Cdk4             | NM_009870   | transcription regulator/nuclear protein | 0.18             | 0.65              | 3244   | 4982   | 0.24              | 564    | 2336   |  |
| 20  | thymopoietin                                                                                      | Tmop             | AA153892    | transcription regulator/nuclear protein | 0.18             | 0.58              | 1227   | 2100   | 0.14              | 216    | 1601   |  |
| 21  | pleomorphic adenoma gene-like 1                                                                   | Plagl1           | AF147785    | transcription regulator/nuclear protein | 0.19             | 0.36              | 2507   | 7049   | 0.11              | 453    | 4306   |  |
| 22  | nescent helix loop helix 1                                                                        | Nhlh1            | NM_010916   | transcription regulator/nuclear protein | 0.19             | 2.0               | 2270   | 1119   | 2.4               | 411    | 168    |  |
| 23  | transducin-like enhancer of split 3, homolog of Drosophila E(spl)                                 | Tle3             | BC006672    | transcription regulator/nuclear protein | 0.19             | 1.2               | 1230   | 998    | 0.23              | 228    | 976    |  |
| 24  | early B-cell factor 2                                                                             | Ebf2             | NM_010095   | transcription regulator/nuclear protein | 0.19             | 14                | 3253   | 225    | 10                | 625    | 62     |  |
| 25  | insulin-like growth factor 2, binding protein 3                                                   | Igf2bp3          | NM_023670   | transcription regulator/nuclear protein | 0.20             | 0.87              | 1473   | 1688   | 0.60              | 299    | 496    |  |
| 26  | transformation related protein 53 inducible nuclear protein 1                                     | p53inp1          | NM_021897   | transcription regulator/nuclear protein | 0.21             | 2.2               | 3858   | 1777   | 0.82              | 806    | 985    |  |
| 27  | LIM homeobox protein 2                                                                            | Lhx2             | NM_010710   | transcription regulator/nuclear protein | 0.21             | 1.1               | 3329   | 2958   | 0.59              | 708    | 1202   |  |
| 28  | serologically defined colon cancer antigen 33                                                     | Sdceag33         | AV291373    | transcription regulator/nuclear protein | 0.21             | 2.9               | 1710   | 597    | 0.56              | 367    | 661    |  |
| 29  | p21 (cyclin-dependent kinase inhibitor 1A)                                                        | p21              | AK007630    | transcription regulator/nuclear protein | 0.22             | 29                | 5090   | 176    | 1.8               | 1102   | 605    |  |
| 30  | neuronal d4 domain family member                                                                  | Neud4            | AW553317    | transcription regulator/nuclear protein | 0.22             | 1.9               | 1305   | 704    | 0.41              | 291    | 715    |  |
| 31  | F-box and leucine-rich repeat protein 10                                                          | Fbxl10           | AF176524    | transcription regulator/nuclear protein | 0.22             | 1.5               | 2308   | 1555   | 0.33              | 517    | 1562   |  |
| 32  | nuclear mitotic apparatus protein 1                                                               | Numa             | BC006631    | transcription regulator/nuclear protein | 0.23             | 1.5               | 1115   | 753    | 0.58              | 253    | 434    |  |
| 33  | SWI/SNF related, matrix associated, actin dependent regulator of chromatin, subfamily e, member 1 | Smardc1          | AK018493    | transcription regulator/nuclear protein | 0.23             | 1.3               | 3376   | 2659   | 0.59              | 774    | 1317   |  |
| 34  | SWI/SNF related, matrix associated, actin dependent regulator of chromatin, subfamily d, member 2 | Smardc2          | NM_031878   | transcription regulator/nuclear protein | 0.23             | 2.5               | 4174   | 1668   | 0.74              | 973    | 1312   |  |
| 35  | CUG triplet repeat.RNA binding protein 2                                                          | Cugbp2           | BG067936    | transcription regulator/nuclear protein | 0.24             | 0.52              | 3244   | 6219   | 0.11              | 774    | 7171   |  |
| 36  | chromosome condensation-related SMC-associated protein 1                                          | Ccscap1          | BC025460    | transcription regulator/nuclear protein | 0.24             | 0.48              | 1304   | 2721   | 0.37              | 318    | 862    |  |
| 37  | cell division cycle associated 4                                                                  | Cdca4            | AF322238    | transcription regulator/nuclear protein | 0.25             | 0.66              | 1353   | 2055   | 0.32              | 338    | 1064   |  |
| 38  | BTB and CNC homology 1, basic leucine zipper transcription factor 1 homolog                       | Bach1            | AV324314    | transcription regulator/nuclear protein | 0.26             | 1.7               | 1286   | 764    | 0.30              | 335    | 1116   |  |
| 39  | BAF53a                                                                                            | Baf53a           | BB094081    | transcription regulator/nuclear protein | 0.26             | 0.83              | 2477   | 2992   | 0.47              | 650    | 1396   |  |
| 40  | polyhomeotic-like 2                                                                               | Phc2             | BB334118    | transcription regulator/nuclear protein | 0.26             | 0.92              | 4809   | 5238   | 0.54              | 1263   | 2335   |  |
| 41  | BTB and CNC homology 1, basic leucine zipper transcription factor 1                               | Bach1            | NM_007520   | transcription regulator/nuclear protein | 0.27             | 1.4               | 1403   | 1026   | 1.0               | 376    | 359    |  |
| 42  | histone 3, H2bb                                                                                   | Hist3h2bb        | AV297651    | transcription regulator/nuclear protein | 0.27             | 2.0               | 2473   | 1242   | 1.0               | 667    | 647    |  |
| 43  | zinc finger protein of the cerebellum 3                                                           | Zic3             | BB732077    | transcription regulator/nuclear protein | 0.27             | 4.7               | 1659   | 355    | 0.74              | 452    | 613    |  |
| 44  | E74-like factor 2                                                                                 | Elf2             | BC027739    | transcription regulator/nuclear protein | 0.27             | 1.1               | 1294   | 1217   | 0.73              | 353    | 485    |  |
| 45  | H2A histone family, member V                                                                      | H2av             | BC028539    | transcription regulator/nuclear protein | 0.28             | 0.53              | 3386   | 6416   | 0.38              | 935    | 2470   |  |
| 46  | splicing factor, arginine/serine-rich 10 homolog                                                  | Sfar10h          | BG229318    | transcription regulator/nuclear protein | 0.28             | 0.94              | 1525   | 1626   | 0.43              | 424    | 983    |  |
| 47  | histone 3, H2ba                                                                                   | Hist3h2ba        | NM_030082   | transcription regulator/nuclear protein | 0.29             | 1.4               | 2408   | 1663   | 1.2               | 692    | 565    |  |
| 48  | RNA binding motif protein, X chromosome                                                           | Rbmx             | NM_011252   | transcription regulator/nuclear protein | 0.30             | 0.67              | 1605   | 2416   | 0.23              | 477    | 2036   |  |
| 49  | LIM homeobox protein 1                                                                            | Lhx1             | NM_008498   | transcription regulator/nuclear protein | 0.30             | 323               | 2431   | 8      | 163               | 728    | 4      |  |
| 50  | jumonji domain containing 1                                                                       | Jmjd1            | BC026605    | transcription regulator/nuclear protein | 0.30             | 0.79              | 1583   | 1998   | 0.42              | 479    | 1138   |  |
| 51  | immediate early response 5                                                                        | Ier5             | NM_010500   | transcription regulator/nuclear protein | 0.30             | 1.0               | 1909   | 1868   | 0.82              | 578    | 704    |  |
| 52  | zinc finger protein 532                                                                           | Znf532           | BB404446    | transcription regulator/nuclear protein | 0.30             | 1.2               | 1581   | 1281   | 0.59              | 480    | 817    |  |
| 53  | p35 (cyclin-dependent kinase 5, regulatory subunit)                                               | p35              | BB177836    | transcription regulator/nuclear protein | 0.30             | 3.5               | 7205   | 2082   | 0.93              | 2191   | 2364   |  |
| 54  | mbt domain containing 1                                                                           | Mbt1             | NM_134012   | transcription regulator/nuclear protein | 0.31             | 0.91              | 2082   | 2300   | 0.42              | 636    | 1532   |  |
| 55  | stress induced protein homolog                                                                    | Siph             | AK003956    | transcription regulator/nuclear protein | 0.31             | 2.2               | 1833   | 822    | 0.96              | 563    | 586    |  |
| 56  | poly(rC) binding protein 4                                                                        | Pcbp4            | NM_021567   | transcription regulator/nuclear protein | 0.31             | 1.0               | 1156   | 1108   | 0.91              | 357    | 391    |  |
| 57  | quaking                                                                                           | Qk               | AF090403    | transcription regulator/nuclear protein | 0.31             | 0.58              | 2447   | 4221   | 0.23              | 757    | 3261   |  |
| 58  | ASF1 anti-silencing function 1 homolog A                                                          | Asf1a            | AK007804    | transcription regulator/nuclear protein | 0.31             | 0.63              | 1162   | 1850   | 0.32              | 364    | 1122   |  |
| 59  | high mobility group box 3                                                                         | Hmgb3            | NM_008253   | transcription regulator/nuclear protein | 0.32             | 0.78              | 5168   | 6635   | 0.39              | 1639   | 4229   |  |
| 60  | glia derived growth factor                                                                        | Gdn              | NM_009255   | extracellular signaling molecule        | 0.06             | 36                | 3508   | 98     | 0.06              | 196    | 3277   |  |
| 61  | insulin-like growth factor binding protein 2                                                      | Igf1bp2          | AK011784    | extracellular signaling molecule        | 0.08             | 0.63              | 1364   | 2161   | 0.06              | 111    | 1756   |  |
| 62  | thrombospondin-like gene homolog                                                                  | Tslh             | BG067392    | extracellular signaling molecule        | 0.11             | 6.1               | 1252   | 207    | 0.41              | 132    | 322    |  |
| 63  | sulfate 2                                                                                         | Sulf2            | AK008108    | extracellular signaling molecule        | 0.11             | 6.3               | 1902   | 300    | 0.71              | 212    | 300    |  |
| 64  | lamin B1                                                                                          | Lmnb1            | AA270173    | extracellular signaling molecule        | 0.22             | 1.1               | 1916   | 1798   | 0.36              | 415    | 1144   |  |
| 65  | chondroitin sulfate proteoglycan 2                                                                | Cspg2            | BI692925    | extracellular signaling molecule        | 0.23             | 4.8               | 4499   | 928    | 0.66              | 1050   | 1594   |  |
| 66  | matrix metalloproteinase 14                                                                       | Mmp14            | NM_008608   | extracellular signaling molecule        | 0.27             | 1.4               | 1149   | 804    | 0.27              | 309    | 1129   |  |
| 67  | chemokine orphan receptor 1                                                                       | Cmkor1           | BC015254    | receptor/channel/transmembrane protein  | 0.01             | 5.8               | 3138   | 544    | 0.11              | 46     | 411    |  |
| 68  | growth arrest specific 1                                                                          | Gas1             | NM_008086   | receptor/channel/transmembrane protein  | 0.04             | 0.28              | 1289   | 4680   | 0.02              | 56     | 2836   |  |
| 69  | transforming growth factor, beta receptor I                                                       | Tgfb1            | BM248342    | receptor/channel/transmembrane protein  | 0.09             | 0.64              | 1135   | 1783   | 0.09              | 106    | 1199   |  |
| 70  | calcium channel, voltage-dependent, gamma subunit 4                                               | Cacng4           | BB333636    | receptor/channel/transmembrane protein  | 0.12             | 5.6               | 2138   | 382    | 0.37              | 246    | 661    |  |
| 71  | neuropilin 2                                                                                      | Nrp2             | BQ176723    | receptor/channel/transmembrane protein  | 0.12             | 4.5               | 1741   | 390    | 0.94              | 213    | 226    |  |
| 72  | CD24a antigen                                                                                     | Cd24a            | NM_009846   | receptor/channel/transmembrane protein  | 0.13             | 1.2               | 8208   | 6986   | 0.15              | 1053   | 7046   |  |
| 73  | protein tyrosine phosphatase, receptor type, O                                                    | Ptpro            | NM_011216   | receptor/channel/transmembrane protein  | 0.14             | 1.2               | 1087   | 914    | 0.09              | 154    | 1700   |  |
| 74  | activin receptor IIB                                                                              | Acrv11b          | NM_007397   | receptor/channel/transmembrane protein  | 0.16             | 1.2               | 1372   | 1150   | 0.83              | 214    | 260    |  |
| 75  | delta-like 1                                                                                      | Dll1             | NM_007865   | receptor/channel/transmembrane protein  | 0.16             | 1.1               | 2012   | 1880   | 0.42              | 318    | 759    |  |
| 76  | ephrin B1                                                                                         | Efnb1            | AI789778    | receptor/channel/transmembrane protein  | 0.16             | 0.71              | 1116   | 1575   | 0.22              | 177    | 821    |  |
| 77  | immunoglobulin superfamily, member 4                                                              | Igsf4            | BB832194    | receptor/channel/transmembrane protein  | 0.17             | 0.68              | 1035   | 1517   | 0.12              | 180    | 1487   |  |
| 78  | transmembrane protein 2                                                                           | Tmem2            | BC019745    | receptor/channel/transmembrane protein  | 0.22             | 0.75              | 1354   | 1810   | 0.52              | 292    | 565    |  |
| 79  | podocalyxin-like                                                                                  | Podxl            | AF290209    | receptor/channel/transmembrane protein  | 0.22             | 2.0               | 1452   | 719    | 0.43              | 314    | 731    |  |
| 80  | transmembrane 4 superfamily member 9                                                              | Tm4sf9           | NM_019571   | receptor/channel/transmembrane protein  | 0.26             | 1.5               | 1915   | 1264   | 0.19              | 496    | 2598   |  |
| 81  | ephrin B2                                                                                         | Efnb2            | BB452953    | receptor/channel/transmembrane protein  | 0.26             | 1.2               | 1864   | 1599   | 0.37              | 485    | 1307   |  |
| 82  | plexin B2                                                                                         | Plxn2            | NM_138749   | receptor/channel/transmembrane protein  | 0.26             | 1.7               | 2772   | 1614   | 0.72              | 733    | 1014   |  |
| 83  | discoidin domain receptor family, member 1                                                        | Ddr1             | BB234940    | receptor/channel/transmembrane protein  | 0.28             | 1.4               | 1960   | 1378   | 0.36              | 555    | 1536   |  |
| 84  | protein C20orf103 homolog precursor                                                               | 6330527006Rik    | BC004791    | trafficking/organellar protein          | 0.01             | 107               | 1257   | 12     | 0.10              | 12     | 121    |  |
| 85  | sialyltransferase 8B                                                                              | Siat8b           | NM_009181   | trafficking/organellar protein          | 0.10             | 1.7               | 2979   | 1717   | 0.12              | 305    | 2504   |  |
| 86  | EH-domain containing 1                                                                            | Ehd1             | NM_010119   | trafficking/organellar protein          | 0.23             | 1.9               | 1163   | 626    | 0.81              | 273    | 339    |  |
| 87  | golgi phosphoprotein 2                                                                            | Golph2           | BC011152    | trafficking/organellar protein          | 0.27             | 0.60              | 1082   | 1799   | 0.40              | 296    | 744    |  |
| 88  | SEC63-like                                                                                        | Sec63            | BM251069    | trafficking/organellar protein          | 0.30             | 1.1               | 1079   | 989    | 0.46              | 319    | 696    |  |
| 89  | thioredoxin domain containing 7                                                                   | Txnd7            | BC006865    | trafficking/organellar protein          | 0.31             | 1.2               | 3490   | 3013   | 0.60              | 1098   | 1844   |  |
| 90  | regulator of G-protein signaling 16                                                               | Rgs16            | BB100249    | intracellular signaling molecule        | 0.07             | 1.7               | 1061   | 616    | 0.11              | 77     | 704    |  |
| 91  | doublecortin                                                                                      | Dcx              | AB011678    | intracellular signaling molecule        | 0.09             | 1.6               | 7088   | 4437   | 0.12              | 641    | 5190   |  |
| 92  | signal-induced proliferation-associated 1 like 2                                                  | Sipa112          | AV228782    | intracellular signaling molecule        | 0.10             | 2.2               | 2836   | 1288   | 0.36              | 287    | 790    |  |
| 93  | intersectin                                                                                       | Itsn             | BM248471    | intracellular signaling molecule        | 0.11             | 1.2               | 1566   | 1326   | 0.17              | 166    | 985    |  |
| 94  | testin                                                                                            | Tes              | BC010465    | intracellular signaling molecule        | 0.13             | 2.5               | 1079   | 431    | 0.43              | 145    | 338    |  |
| 95  | differential display and activated by p53                                                         | Dda3             | NM_019976   | intracellular signaling molecule        | 0.14             | 0.91              | 1380   | 1524   | 0.51              | 199    | 390    |  |
| 96  | RCC1-like                                                                                         | Rcc1             | AV122997    | intracellular signaling molecule        | 0.15             | 0.54              | 1583   | 2935   | 0.21              | 242    | 1177   |  |
| 97  | cezanne 2                                                                                         | Cezanne 2        | NM_130880   | intracellular signaling molecule        | 0.17             | 4.6               | 1916   | 419    | 0.79              | 322    | 406    |  |
| 98  | tripartite motif protein 37                                                                       | Trim37           | BM119247    | intracellular signaling molecule        | 0.18             | 1.2               | 5237   | 4314   | 0.47              | 919    | 1970   |  |
| 99  | growth factor receptor bound protein 10                                                           | Grb10            | AK017862    | intracellular signaling molecule        | 0.19             | 0.27              | 1449   | 5341   | 0.19              | 274    | 1434   |  |
| 100 | calcium regulated heat stable protein 1                                                           | Carhsp1          | NM_025821   | intracellular signaling molecule        | 0.23             | 6.7               | 3517   | 525    | 0.72              | 812    | 1128   |  |
| 101 | protein kinase C, nu                                                                              | Prkcn            | BF160591    | intracellular signaling molecule        | 0.23             | 0.64              | 1063   | 1672   | 0.20              | 249    | 1222   |  |
| 102 | SH3-binding kinase                                                                                | Sbk              | BC025837    | intracellular signaling molecule        | 0.24             | 1.3               | 3100   | 2458   | 0.50              | 747    | 1503   |  |
| 103 | tax-interacting protein-1                                                                         | Tip1             | AV139821    | intracellular signaling molecule        | 0.24             | 1.9               | 3017   | 1596   | 0.51              | 735    | 1441   |  |
| 104 | SPRY domain-containing SOCS box protein SSB-1                                                     | Ssb1             | AI596360    | intracellular signaling molecule        | 0.25             | 6.9               | 1804   |        |                   |        |        |  |
