# Supplementary material
Source: PubMed Central journal article supplement (PMC521974)
Supplement: pnas_101_40_14509__2.pdf [file pnas_101_40_14509__2.pdf]

Table 2. Expression Profile of P2 Genes

| No. | gene name                                                               | abbreviated name | GenBank No. | category                                | ratio (P2/E13.5) | E13.5             |        |      | P2                |        |      |
|-----|-------------------------------------------------------------------------|------------------|-------------|-----------------------------------------|------------------|-------------------|--------|------|-------------------|--------|------|
|     |                                                                         |                  |             |                                         |                  | ratio (CR/non-CR) | signal |      | ratio (CR/non-CR) | signal |      |
|     |                                                                         |                  |             |                                         |                  | CR                | non-CR |      | CR                | non-CR |      |
| 1   | basic transcription element binding protein 1                           | Bteb1            | AV354744    | transcription regulator/nuclear protein | 36               | 1.7               | 172    | 103  | 2.6               | 6176   | 2342 |
| 2   | thyroid hormone responsive SPOT14 homolog                               | Thrsp            | BC009165    | transcription regulator/nuclear protein | 10               | 3.1               | 187    | 60   | 4.3               | 1915   | 444  |
| 3   | FBJ osteosarcoma oncogene                                               | Fos              | AV026617    | transcription regulator/nuclear protein | 7.0              | 1.0               | 848    | 824  | 0.82              | 5954   | 7239 |
| 4   | cyclin-dependent kinase-like 2                                          | Cdkl2            | NM_016912   | transcription regulator/nuclear protein | 6.9              | 1.6               | 144    | 89   | 4.3               | 1001   | 234  |
| 5   | peroxisome proliferative activated receptor, gamma, coactivator 1       | Ppargc1          | BB745167    | transcription regulator/nuclear protein | 4.5              | 3.4               | 266    | 78   | 6.0               | 1203   | 201  |
| 6   | purine rich element binding protein A                                   | Pura             | NM_008989   | transcription regulator/nuclear protein | 4.5              | 0.92              | 324    | 353  | 2.2               | 1443   | 653  |
| 7   | myocyte enhancer factor 2A                                              | Mef2a            | BG072973    | transcription regulator/nuclear protein | 3.4              | 1.6               | 596    | 378  | 3.5               | 2026   | 587  |
| 8   | transcription elongation factor A (SII)-like 1                          | Tcea1            | BC011290    | transcription regulator/nuclear protein | 3.2              | 1.1               | 391    | 352  | 1.5               | 1253   | 812  |
| 9   | RNA binding motif, single stranded interacting protein 1                | Rbms1            | AW541585    | transcription regulator/nuclear protein | 3.0              | 9.2               | 895    | 98   | 5.5               | 2704   | 488  |
| 10  | acetylcholinesterase                                                    | Ache             | NM_009599   | extracellular signaling molecule        | 93               | 0.33              | 22     | 65   | 60                | 2010   | 33   |
| 11  | prepronociceptin                                                        | Pnoc             | D50055      | extracellular signaling molecule        | 66               | 0.18              | 18     | 98   | 13                | 1188   | 91   |
| 12  | nephroectin                                                             | Nprt             | AA223007    | extracellular signaling molecule        | 29               | 0.93              | 78     | 84   | 24                | 2253   | 94   |
| 13  | chemokine (C-X-C motif) ligand 12                                       | Cxcl12           | BC006640    | extracellular signaling molecule        | 26               | 0.43              | 479    | 114  | 41                | 12676  | 311  |
| 14  | neprilysin (enkephalinase)                                              | Nep              | AV174022    | extracellular signaling molecule        | 22               | 1.5               | 59     | 40   | 12                | 1266   | 104  |
| 15  | growth differentiation factor 5                                         | Gdf5             | NM_008109   | extracellular signaling molecule        | 20               | 4.0               | 161    | 40   | 91                | 3253   | 36   |
| 16  | cholecystokinin                                                         | Cck              | NM_031161   | extracellular signaling molecule        | 15               | 3.8               | 86     | 22   | 2.0               | 1295   | 645  |
| 17  | carbonic anhydrase 10                                                   | Car10            | BC017606    | extracellular signaling molecule        | 15               | 25                | 146    | 6    | 61                | 2159   | 35   |
| 18  | dickkopf homolog 3                                                      | Dkk3             | AK004853    | extracellular signaling molecule        | 13               | 1.3               | 318    | 240  | 4.2               | 4255   | 1010 |
| 19  | protein related to DAN and cerberus                                     | Prdc             | NM_011825   | extracellular signaling molecule        | 9.2              | 1.1               | 300    | 268  | 11                | 2765   | 241  |
| 20  | plasticity-related gene 1                                               | Prg1             | BB238462    | extracellular signaling molecule        | 8.6              | 1.4               | 172    | 122  | 2.7               | 1473   | 542  |
| 21  | procollagen, type VI, alpha 2                                           | Col6a2           | BI455189    | extracellular signaling molecule        | 8.5              | 0.53              | 334    | 626  | 6.5               | 2825   | 432  |
| 22  | elastin                                                                 | Eln              | BB229377    | extracellular signaling molecule        | 6.7              | 0.92              | 358    | 389  | 4.8               | 2414   | 501  |
| 23  | cystatin C                                                              | Cst3             | AF483486    | extracellular signaling molecule        | 5.3              | 1.1               | 1823   | 1625 | 1.5               | 9698   | 6462 |
| 24  | melanoma inhibitory activity                                            | Mia              | NM_019394   | extracellular signaling molecule        | 5.1              | 2.2               | 267    | 120  | 9.1               | 1367   | 150  |
| 25  | mammalian ependymin related protein- 2                                  | Merp2            | BM231893    | extracellular signaling molecule        | 4.5              | 0.57              | 236    | 412  | 2.0               | 1055   | 525  |
| 26  | chromogranin B                                                          | Chgb             | NM_007694   | extracellular signaling molecule        | 4.4              | 3.7               | 752    | 205  | 4.7               | 3298   | 697  |
| 27  | tissue inhibitor of metalloproteinase 2                                 | Timp2            | C81601      | extracellular signaling molecule        | 3.9              | 2.6               | 2078   | 806  | 3.3               | 8046   | 2475 |
| 28  | carbonic anhydrase 11                                                   | Car11            | BC019393    | extracellular signaling molecule        | 3.5              | 1.8               | 346    | 196  | 5.5               | 1216   | 223  |
| 29  | GTL2, imprinted maternally expressed untranslated mRNA                  | Gtl2             | BM117428    | extracellular signaling molecule        | 3.3              | 1.6               | 308    | 192  | 4.5               | 1002   | 220  |
| 30  | tufelin 1                                                               | Tuf1             | NM_011656   | extracellular signaling molecule        | 3.2              | 2.7               | 528    | 193  | 8.6               | 1702   | 199  |
| 31  | latent transforming growth factor beta binding protein 3                | Ltbp3            | BB324823    | extracellular signaling molecule        | 3.0              | 0.50              | 548    | 1096 | 1.4               | 1657   | 1184 |
| 32  | receptor (calcitonin) activity modifying protein 1                      | Ramp1            | NM_016894   | receptor/channel/transmembrane protein  | 32               | 1.9               | 193    | 100  | 16                | 6234   | 395  |
| 33  | thymus cell antigen 1, theta                                            | Thy-1            | AV028402    | receptor/channel/transmembrane protein  | 27               | 0.97              | 115    | 119  | 10                | 3087   | 299  |
| 34  | programmed cell death 1 ligand 1                                        | PD-L1            | NM_021893   | receptor/channel/transmembrane protein  | 25               | 12                | 75     | 6    | 237               | 1892   | 8    |
| 35  | glutamate receptor, ionotropic, AMPA1 (alpha 1)                         | Gria1            | NM_008165   | receptor/channel/transmembrane protein  | 12               | 0.63              | 84     | 133  | 2.4               | 1040   | 430  |
| 36  | CD47 antigen                                                            | Cd47             | BQ256022    | receptor/channel/transmembrane protein  | 7.3              | 1.5               | 523    | 350  | 6.7               | 3811   | 569  |
| 37  | transmembrane 4 superfamily member 10                                   | Tm4sf10          | AI505784    | receptor/channel/transmembrane protein  | 7.3              | 1.2               | 270    | 224  | 3.1               | 1970   | 643  |
| 38  | calcium channel, voltage-dependent, gamma subunit 5                     | Cacng5           | BQ174680    | receptor/channel/transmembrane protein  | 7.3              | 4.0               | 398    | 101  | 4.3               | 2889   | 676  |
| 39  | integral membrane protein 2A                                            | Itm2a            | AA275072    | receptor/channel/transmembrane protein  | 6.4              | 0.62              | 195    | 313  | 0.83              | 1257   | 1510 |
| 40  | protein tyrosine phosphatase, receptor type, E                          | Ptpre            | U35368      | receptor/channel/transmembrane protein  | 6.2              | 1.2               | 205    | 174  | 3.3               | 1281   | 394  |
| 41  | purinergic receptor P2X, ligand-gated ion channel, 5                    | P2x5             | NM_033321   | receptor/channel/transmembrane protein  | 4.3              | 2.7               | 445    | 168  | 18                | 1906   | 104  |
| 42  | tumor necrosis factor receptor superfamily, member 19                   | Tnfrsf19         | NM_013869   | receptor/channel/transmembrane protein  | 3.9              | 0.45              | 645    | 1433 | 1.5               | 2509   | 1623 |
| 43  | Eph receptor B6                                                         | Ephb6            | NM_007680   | receptor/channel/transmembrane protein  | 3.8              | 4.0               | 446    | 113  | 6.6               | 1678   | 255  |
| 44  | calyculin 2                                                             | Clstn2           | NM_022319   | receptor/channel/transmembrane protein  | 3.7              | 4.2               | 496    | 119  | 7.6               | 1851   | 244  |
| 45  | protein tyrosine phosphatase, receptor type, N                          | Ptpn             | NM_008985   | receptor/channel/transmembrane protein  | 3.4              | 5.2               | 499    | 95   | 13                | 1710   | 128  |
| 46  | Kv channel-interacting protein 1                                        | Kcnipl           | NM_027398   | receptor/channel/transmembrane protein  | 3.4              | 2.4               | 485    | 200  | 4.1               | 1643   | 404  |
| 47  | crystallin, alpha B                                                     | Cryab            | AV016515    | trafficking/organelle protein           | 351              | 1.2               | 6      | 5    | 23                | 2249   | 98   |
| 48  | ATPase, H+ transporting, V1 subunit G isoform 2                         | Atp6v1g2         | BC020190    | trafficking/organelle protein           | 9.7              | 1.6               | 301    | 184  | 7.1               | 2930   | 410  |
| 49  | SEC24 related gene family, member D                                     | Sec24d           | AK009425    | trafficking/organelle protein           | 7.2              | 1.2               | 274    | 236  | 5.1               | 1985   | 392  |
| 50  | t-complex-associated-testis-expressed 1-like                            | Tete1l           | AK010186    | trafficking/organelle protein           | 4.8              | 0.64              | 454    | 711  | 1.8               | 2163   | 1182 |
| 51  | ATPase, Na+/K+ transporting, alpha 3 polypeptide                        | Atp1a3           | BC027114    | trafficking/organelle protein           | 4.4              | 1.8               | 287    | 157  | 4.2               | 1271   | 301  |
| 52  | solute carrier family 20, member 2                                      | Slc20a2          | BB765719    | trafficking/organelle protein           | 4.4              | 0.81              | 332    | 408  | 2.1               | 1464   | 700  |
| 53  | ATPase, Na+/K+ transporting, beta 2 polypeptide                         | Atp1b2           | BG261955    | trafficking/organelle protein           | 4.4              | 6.7               | 365    | 55   | 0.93              | 1600   | 1730 |
| 54  | ATPase, Na+/K+ transporting, beta 1 polypeptide                         | Atp1b1           | BC027319    | trafficking/organelle protein           | 3.9              | 4.0               | 653    | 165  | 0.75              | 2526   | 3387 |
| 55  | solute carrier family 24 (sodium/potassium/calcium exchanger), member 3 | Slc24a3          | BC017615    | trafficking/organelle protein           | 3.5              | 1.9               | 500    | 259  | 2.7               | 1728   | 644  |
| 56  | SH3-domain GRB2-like 2                                                  | Sh3gl2           | BC018385    | trafficking/organelle protein           | 3.3              | 1.3               | 1027   | 819  | 2.9               | 3351   | 1170 |
| 57  | visinin-like 1                                                          | Vsnl1            | AK005091    | intracellular signaling molecule        | 21               | 1.3               | 104    | 82   | 5.2               | 2197   | 422  |
| 58  | spleen tyrosine kinase                                                  | Syk              | NM_011518   | intracellular signaling molecule        | 16               | 1.7               | 68     | 40   | 7.2               | 1070   | 148  |
| 59  | ankyrin repeat domain 3                                                 | Ankrd3           | AF302127    | intracellular signaling molecule        | 14               | 4.8               | 156    | 33   | 269               | 2155   | 8    |
| 60  | regulator of G-protein signaling 4                                      | Rgs4             | BC003882    | intracellular signaling molecule        | 11               | 2.2               | 494    | 223  | 12                | 5189   | 427  |
| 61  | Ras-like without CAAX 2                                                 | Rit2             | NM_009065   | intracellular signaling molecule        | 9.1              | 2.5               | 191    | 76   | 11                | 1733   | 156  |
| 62  | Rho GDP dissociation inhibitor (GDI) gamma                              | Arhgdig          | NM_008113   | intracellular signaling molecule        | 8.5              | 1.7               | 346    | 203  | 3.7               | 2937   | 789  |
| 63  | hippocalcin                                                             | Hpcal            | AK002992    | intracellular signaling molecule        | 6.9              | 1.3               | 341    | 258  | 6.4               | 2342   | 366  |
| 64  | regulator of G-protein signaling 5                                      | Rgs5             | NM_133736   | intracellular signaling molecule        | 6.8              | 0.91              | 373    | 411  | 1.1               | 2526   | 2229 |
| 65  | Purkinje cell protein 4                                                 | Pcp4             | NM_008791   | intracellular signaling molecule        | 5.8              | 1.5               | 1514   | 1025 | 14                | 8716   | 608  |
| 66  | dedicator of cyto-kinesis 1                                             | Dock1            | BQ175788    | intracellular signaling molecule        | 4.9              | 0.33              | 271    | 831  | 1.4               | 1338   | 928  |
| 67  | diablo homolog                                                          | Diablo           | NM_023232   | intracellular signaling molecule        | 4.1              | 1.4               | 1087   | 784  | 7.3               | 4509   | 619  |
| 68  | regulator of G protein signaling 7                                      | Rgs7             | NM_011880   | intracellular signaling molecule        | 4.1              | 6.3               | 498    | 79   | 1.8               | 2063   | 1178 |
| 69  | N-myc downstream regulated 4                                            | Ndr4             | AI837704    | intracellular signaling molecule        | 4.0              | 2.7               | 1698   | 636  | 3.8               | 6749   | 1768 |
| 70  | tumor protein D52                                                       | Tpd52            | NM_009412   | intracellular signaling molecule        | 3.7              | 1.1               | 683    | 612  | 2.6               | 2503   | 979  |
| 71  | phosphoinositid 3-phosphate-binding protein-3 homolog                   | p3h3             | BI905111    | intracellular signaling molecule        | 3.6              | 1.4               | 578    | 409  | 11                | 2093   | 196  |
| 72  | protein phosphatase 1, regulatory (inhibitor) subunit 2                 | Ppp1r2           | NM_025800   | intracellular signaling molecule        | 3.2              | 1.5               | 781    | 514  | 2.9               | 2537   | 860  |
| 73  | N-myc downstream regulated 1                                            | Ndr1             | NM_008681   | intracellular signaling molecule        | 3.1              | 0.81              | 343    | 422  | 0.95              | 1056   | 118  |
| 74  | FK506 binding protein 9                                                 | Fkbp9            | BB026630    | intracellular signaling molecule        | 3.1              | 3.0               | 3950   | 1321 | 4.1               | 12077  | 2937 |
| 75  | protein kinase, cAMP dependent regulatory, type I, alpha                | Prkar1a          | BC005697    | intracellular signaling molecule        | 3.0              | 0.93              | 491    | 529  | 1.7               | 1453   | 840  |
| 76  | protein kinase, cAMP dependent regulatory, type I beta                  | Prkar1b          | BC011424    | intracellular signaling molecule        | 3.0              | 1.7               | 893    | 521  | 1.8               | 2640   | 1470 |
| 77  | dynein, cytoplasmic, intermediate chain 1                               | Dncl1            | NM_010063   | cytoskeletal protein                    | 16               | 3.0               | 316    | 105  | 3.4               | 5200   | 1534 |
| 78  | synapsin II                                                             | Syn2             | NM_013681   | cytoskeletal protein                    | 6.5              | 1.3               | 624    | 483  | 9.6               | 4030   | 421  |
| 79  | erythrocyte protein band 4.1-like 2                                     | Epb4.1l2         | BG075070    | cytoskeletal protein                    | 5.5              | 0.40              | 185    | 458  | 2.3               | 1019   | 435  |
| 80  | dynamitin                                                               | Dnm              | L31397      | cytoskeletal protein                    | 5.0              | 4.9               | 914    | 188  | 7.2               | 4581   | 637  |
| 81  | synaptosomal-associated protein 25                                      | Snap25           | BC018249    | cytoskeletal protein                    | 4.8              | 3.8               | 688    | 183  | 4.0               | 3334   | 837  |
| 82  | plakophilin 4                                                           | Pkp4             | AW764208    | cytoskeletal protein                    | 4.4              | 0.77              | 610    | 789  | 4.4               | 2661   | 602  |
| 83  | complexin 1                                                             | Cplx1            | BC014803    | cytoskeletal protein                    | 4.3              | 2.0               | 1600   | 789  | 3.6               | 6955   | 1929 |
| 84  | protein kinase C and casein kinase substrate in neurons 1               | Pascin1          | NM_011861   | cytoskeletal protein                    | 3.8              | 2.9               | 384    | 134  | 4.3               | 1449   | 339  |
| 85  | microtubule-associated protein 4                                        | Mtap4            | BB280360    | cytoskeletal protein                    | 3.7              | 7.8               | 730    | 94   | 5.9               | 2669   | 454  |
| 86  | tubulin, alpha 4                                                        | Tuba4            | NM_009447   | cytoskeletal protein                    | 3.1              | 0.29              | 681    | 2315 | 2.5               | 2117   | 841  |
| 87  | acylphosphatase 2, muscle type                                          | Acp2             | BI730288    | metabolism                              | 7.9              | 1.3               | 169    | 135  | 4.9               | 1330   | 270  |
| 88  | enolase 2, gamma neuronal                                               | Eno2             | NM_013509   | metabolism                              | 4.9              | 1.9               | 268    | 143  | 5.8               | 1313   | 225  |
| 89  | degenerative spermatocyte homolog                                       | Degs             | AV286991    | metabolism                              | 4.1              | 1.2               | 678    | 571  | 2.3               | 2754   | 1199 |
| 90  | phosphofructokinase, platelet                                           | Pfkb             | NM_019703   | metabolism                              | 3.8              | 4.1               | 543    | 132  | 5.7               | 2051   | 357  |
| 91  | thioesterase superfamily member 2                                       | Them2            | NM_025790   | metabolism                              | 3.7              | 0.71              | 274    | 386  | 2.1               | 1010   | 490  |
| 92  | glucose phosphate isomerase 1                                           | Gpi1             | NM_008155   | metabolism                              | 3.7              | 0.70              | 1836   | 2623 | 5.1               | 6737   | 1320 |
| 93  | galactosidase, beta 1                                                   | Glb1             | NM_009752   | metabolism                              | 3.5              | 2.9               | 403    | 137  | 9.5               | 1417   | 149  |
| 94  | aldolase 1, A isoform                                                   | Aldo1            | NM_007438   | metabolism                              | 3.4              | 0.91              | 2844   | 3114 | 4.2               | 9622   | 2312 |
| 95  | glucosidase, alpha, acid                                                | Gaa              | BB357227    | metabolism                              | 3.0              | 1.1               | 709    | 657  | 3.6               | 2148   | 590  |
| 96  | triosephosphate isomerase                                               | Tpi              | NM_009415   | metabolism                              | 3.0              | 0.40              | 1711   | 4239 | 3.3               | 5147   | 1556 |
| 97  | 4-aminobutyrate aminotransferase                                        | Abat             | BF462185    | metabolism                              | 4.7              | 35                | 466    | 13   | 7.9               | 2210   | 280  |
| 98  | isochorismatase family hydrolase homolog                                | Ihh              | BC016576    | others/undefined                        | 7.1              | 0.70              | 501    | 720  | 4.6               | 3536   | 763  |
| 99  | eukaryotic translation elongation factor 1 alpha 2                      | Eef1a2           | NM_007906   | others/undefined                        | 6.5              | 2.8               | 1161   | 417  | 9.7               | 7530   | 779  |
| 100 | histidyl tRNA synthetase 2                                              | Hars2            | AI451865    | others/undefined                        | 4.9              | 0.82              | 216    | 262  | 3.2               | 1048   | 324  |
| 101 | cytochrome P450, family 46, subfamily a, polypeptide 1                  | Cyp46a1          | NM_010010   | others/undefined                        | 4.5              | 0.67              | 339    | 508  | 2.5               | 1527   | 613  |
| 102 | imprinted and ancient                                                   | Impact           | NM_008378   | others/undefined                        | 3.9              | 1.3               | 374    | 294  | 2.7               | 1453   | 544  |
| 103 | prion protein                                                           | Pnp              | BE630020    | others/undefined                        | 3.8              | 2.32              | 1255   | 541  | 4.0               | 4818   | 1202 |
| 104 | deleted in polyposis 1                                                  | Dp1              | BG069654    | others/undefined                        | 3.6              | 1.7               | 400    | 238  | 5.8               | 1440   | 251  |
| 105 | cytochrome c oxidase, subunit Vb                                        | Cox5b            | AA960638    | others/undefined                        | 3.2              | 0.89              | 1320   | 1487 | 1.6               | 4249   | 2697 |
| 106 | apoptosis related protein APR-3                                         | Arp3             | AK002276    | others/undefined                        | 3.2              | 1.2               | 489    | 400  | 1.4               | 1560   | 1086 |
| 107 | NADH dehydrogenase (ubiquinone) 1 beta subcomplex, 2                    | Ndufb2           | NM_026612   | others/undefined                        | 3.2              | 1.8               | 514    | 288  | 4.0               | 1626   | 411  |
| 108 | per                                                                     |                  |             |                                         |                  |                   |        |      |                   |        |      |
