# Supplementary material
Source: PubMed Central journal article supplement (PMC521974)
Supplement: pnas_101_40_14509__3.pdf [file pnas_101_40_14509__3.pdf]

Table 3. Gene Expression Profile in E13.5 CR Cells

| No. | gene name                                                   | abbreviated name | GenBank No. | category                                | ratio (P2/E13.5) | E13.5             |        |        |
|-----|-------------------------------------------------------------|------------------|-------------|-----------------------------------------|------------------|-------------------|--------|--------|
|     |                                                             |                  |             |                                         |                  | ratio (CR/non-CR) | signal |        |
|     |                                                             |                  |             |                                         |                  |                   | CR     | non-CR |
| 1   | LIM homeobox protein 1                                      | Lhx1             | NM_008498   | transcription regulator/nuclear protein | 0.30             | 323               | 2431   | 8      |
| 2   | transformation related protein 73                           | p73              | AK014503    | transcription regulator/nuclear protein | 0.76             | 51                | 5298   | 104    |
| 3   | early B-cell factor 3                                       | Ebf3             | AK014058    | transcription regulator/nuclear protein | 0.59             | 47                | 4141   | 88     |
| 4   | p21(cyclin-dependent kinase inhibitor 1A )                  | p21              | AK007630    | transcription regulator/nuclear protein | 0.22             | 29                | 5090   | 176    |
| 5   | LIM homeobox protein 5                                      | Lhx5             | NM_008499   | transcription regulator/nuclear protein | 0.71             | 16                | 1534   | 96     |
| 6   | early B-cell factor 2                                       | Ebf2             | NM_010095   | transcription regulator/nuclear protein | 0.19             | 14                | 3253   | 225    |
| 7   | RNA binding motif, single stranded interacting protein 1    | Rbms1            | NM_020296   | transcription regulator/nuclear protein | 1.54             | 8.1               | 1033   | 127    |
| 8   | nuclear receptor subfamily 2, group F, member 2             | Nr2f2            | U07635      | transcription regulator/nuclear protein | 0.64             | 8.0               | 3438   | 427    |
| 9   | zinc finger protein of the cerebellum 5                     | Zic5             | BM199323    | transcription regulator/nuclear protein | 0.56             | 7.2               | 1599   | 223    |
| 10  | bruno-like 4, RNA binding protein                           | Brunol4          | BB748921    | transcription regulator/nuclear protein | 1.60             | 6.8               | 1580   | 231    |
| 11  | zinc finger protein of the cerebellum 1                     | Zic1             | BB361162    | transcription regulator/nuclear protein | 0.95             | 6.3               | 4862   | 772    |
| 12  | forkhead box O3                                             | Foxo3            | BB364488    | transcription regulator/nuclear protein | 0.63             | 6.2               | 1825   | 294    |
| 13  | kruppel-like factor 7                                       | Klf7             | AF338369    | transcription regulator/nuclear protein | 0.78             | 6.0               | 2885   | 485    |
| 14  | histone deacetylase 11                                      | Hdac11           | BC016208    | transcription regulator/nuclear protein | 0.97             | 5.4               | 1728   | 322    |
| 15  | testis expressed gene 264                                   | Tex264           | BC002248    | extracellular signaling molecule        | 1.2              | 76                | 2371   | 31     |
| 16  | glia derived nexin precursor                                | Gdn              | NM_009255   | extracellular signaling molecule        | 0.06             | 36                | 3508   | 98     |
| 17  | reelin                                                      | Reln             | NM_011261   | extracellular signaling molecule        | 0.90             | 18                | 17912  | 1019   |
| 18  | matrix metalloproteinase 2                                  | Mmp2             | BF147716    | extracellular signaling molecule        | 0.58             | 11                | 1868   | 172    |
| 19  | sulfatase 2                                                 | Sulf2            | AK008108    | extracellular signaling molecule        | 0.11             | 6.3               | 1902   | 300    |
| 20  | EGF-like repeats and discordin I-like domains 3             | Edil3            | BB377340    | extracellular signaling molecule        | 2.4              | 6.1               | 1087   | 179    |
| 21  | thrombospondin-like gene homolog                            | Tslh             | BG067392    | extracellular signaling molecule        | 0.11             | 6.1               | 1252   | 207    |
| 22  | four jointed box 1                                          | Fjx1             | NM_010218   | extracellular signaling molecule        | 0.51             | 5.1               | 2695   | 530    |
| 23  | calcium channel, voltage-dependent, alpha 2/delta subunit 2 | Cacna2d2         | AF247139    | receptor/channel/transmembrane protein  | 0.91             | 113               | 8995   | 80     |
| 24  | unc-5 homolog 2                                             | Unc5h2           | BG065285    | receptor/channel/transmembrane protein  | 1.0              | 23                | 3247   | 142    |
| 25  | calcium channel, voltage dependent, alpha 2/delta subunit 3 | Cacna2d3         | NM_009785   | receptor/channel/transmembrane protein  | 0.98             | 16                | 2169   | 132    |
| 26  | sodium channel, voltage-gated beta-3 subunit                | Scn3b            | BE951842    | receptor/channel/transmembrane protein  | 1.0              | 14                | 4523   | 333    |
| 27  | high temperature-Induced Dauer formation HID-1              | Hid1             | BC024617    | receptor/channel/transmembrane protein  | 0.92             | 13                | 1294   | 103    |
| 28  | chemokine (C-X-C motif) receptor 4                          | Cxcr4            | D87747      | receptor/channel/transmembrane protein  | 0.98             | 12                | 1081   | 87     |
| 29  | lymphocyte antigen 6 complex, locus H                       | Ly6h             | NM_011837   | receptor/channel/transmembrane protein  | 1.0              | 9.9               | 4442   | 448    |
| 30  | antigen identified by monoclonal antibody MRC OX-2          | Mox2             | AF004023    | receptor/channel/transmembrane protein  | 2.7              | 9.8               | 2282   | 233    |
| 31  | plexin D1                                                   | Plxd1            | BC019530    | receptor/channel/transmembrane protein  | 0.88             | 9.0               | 2544   | 282    |
| 32  | tumor necrosis factor receptor superfamily, member 21       | Tnfrsf21         | BG972377    | receptor/channel/transmembrane protein  | 1.4              | 7.4               | 2006   | 271    |
| 33  | neurotrimin                                                 | Hnt              | AK018085    | receptor/channel/transmembrane protein  | 1.7              | 7.1               | 1089   | 154    |
| 34  | BNP receptor                                                | Binpr            | AK009669    | receptor/channel/transmembrane protein  | 1.2              | 7.0               | 2085   | 297    |
| 35  | potassium channel, subfamily K, member 2                    | Kcnk2            | NM_010607   | receptor/channel/transmembrane protein  | 1.3              | 6.7               | 1542   | 231    |
| 36  | contactin associated protein-like 2                         | Cntnap2          | BE651445    | receptor/channel/transmembrane protein  | 2.6              | 6.0               | 2226   | 371    |
| 37  | chemokine orphan receptor 1                                 | Cmkor1           | BC015254    | receptor/channel/transmembrane protein  | 0.01             | 5.8               | 3138   | 544    |
| 38  | type I transmembrane receptor (seizure-related protein)     | Psk1             | BC011475    | receptor/channel/transmembrane protein  | 1.3              | 5.7               | 1321   | 230    |
| 39  | calcium channel, voltage-dependent, gamma subunit 4         | Cacng4           | BB333636    | receptor/channel/transmembrane protein  | 0.12             | 5.6               | 2138   | 382    |
| 40  | glycerophosphodiester phosphodiesterase 3 homolog           | Gp3h             | BC024955    | receptor/channel/transmembrane protein  | 0.88             | 5.6               | 1446   | 260    |
| 41  | delta/notch-like EGF-related receptor                       | Dner             | AF370126    | receptor/channel/transmembrane protein  | 0.89             | 5.3               | 3576   | 675    |
| 42  | protein C20orf103 homolog precursor                         | 6330527O06Rik    | BC004791    | trafficking/organelle protein           | 0.01             | 107               | 1257   | 12     |
| 43  | sialyltransferase 7E                                        | Siat7e           | AB028840    | trafficking/organelle protein           | 0.75             | 32                | 1899   | 59     |
| 44  | proprotein convertase subtilisin/kexin type 1 inhibitor     | Pcsk1n           | AF181560    | trafficking/organelle protein           | 2.2              | 13                | 2317   | 179    |
| 45  | calretinin                                                  | Calr             | BC017646    | intracellular signaling molecule        | 1.8              | 109               | 5080   | 47     |
| 46  | mab-21-like 1                                               | Mab21l1          | AF228913    | intracellular signaling molecule        | 0.80             | 61                | 1330   | 22     |
| 47  | down syndrome critical region gene 1-like 1                 | Dscr1l1          | AB061524    | intracellular signaling molecule        | 0.78             | 36                | 7656   | 214    |
| 49  | protein kinase, cAMP dependent regulatory, type I beta      | Prkar1b          | BB274009    | intracellular signaling molecule        | 2.4              | 10                | 2925   | 281    |
| 50  | SPRY domain-containing SOCS box protein SSB-1               | Ssb1             | AI596360    | intracellular signaling molecule        | 0.25             | 6.9               | 1804   | 263    |
| 51  | calcium regulated heat stable protein 1                     | Carhsp1          | NM_025821   | intracellular signaling molecule        | 0.23             | 6.7               | 3517   | 525    |
| 52  | dapper homolog 1, antagonist of beta-catenin                | Dact1            | NM_021532   | intracellular signaling molecule        | 0.59             | 6.3               | 5485   | 869    |
| 53  | adenylate cyclase 2                                         | Adecy2           | AV025455    | intracellular signaling molecule        | 1.9              | 5.7               | 1492   | 260    |
| 54  | stathmin-like 2                                             | Stmn2            | BM946869    | intracellular signaling molecule        | 1.5              | 5.7               | 6620   | 1162   |
| 55  | CXXC finger 5                                               | Cxxc5            | NM_133687   | intracellular signaling molecule        | 0.76             | 5.6               | 3391   | 604    |
| 56  | desmoplakin                                                 | Dsp              | AV297961    | cytoskeletal protein                    | 0.70             | 27                | 2590   | 97     |
| 57  | erythrocyte protein band 4.1-like 4a                        | Epb4.114a        | NM_013512   | cytoskeletal protein                    | 0.80             | 15                | 1381   | 94     |
| 58  | microtubule-associated protein tau                          | tau              | M18775      | cytoskeletal protein                    | 1.4              | 13                | 2175   | 162    |
| 48  | stathmin-like 4                                             | Stmn4            | NM_019675   | cytoskeletal protein                    | 0.42             | 8.8               | 3326   | 376    |
| 59  | growth associated protein 43                                | Gap43            | BB622036    | cytoskeletal protein                    | 1.4              | 8.5               | 8099   | 956    |
| 60  | actin-like 6                                                | Actl6            | NM_031404   | cytoskeletal protein                    | 0.58             | 7.3               | 2305   | 317    |
| 61  | ankyrin 3, epithelial                                       | Ank3             | BC021657    | cytoskeletal protein                    | 0.85             | 6.6               | 2387   | 359    |
| 62  | internexin neuronal intermediate filament protein, alpha    | Ina              | BC018383    | cytoskeletal protein                    | 0.52             | 6.4               | 5049   | 788    |
| 63  | 3-ketoacyl-CoA thiolase B                                   | Kctb             | BC019882    | metabolism                              | 0.92             | 16                | 1208   | 75     |

Sixty-three genes which showed more than 5 times increase in CR cells over non-CR cells at E13.5 are listed. For other explanations, see Fig. 2.
