# Supplementary material
Source: PubMed Central journal article supplement (PMC521974)
Supplement: pnas_101_40_14509__4.pdf [file pnas_101_40_14509__4.pdf]

Table 4. Gene expression Profile in P2 CR Cells

| No. | gene name                                                       | abbreviated name | GenBank No. | category                                | ratio<br>(P2/E13.5) | P2                   |        |        |
|-----|-----------------------------------------------------------------|------------------|-------------|-----------------------------------------|---------------------|----------------------|--------|--------|
|     |                                                                 |                  |             |                                         |                     | ratio<br>(CR/non-CR) | signal |        |
|     |                                                                 |                  |             |                                         |                     |                      | CR     | non-CR |
| 1   | early B-cell factor 3                                           | Ebf3             | AK014058    | transcription regulator/nuclear protein | 0.59                | 248                  | 2342   | 9      |
| 2   | LIM homeobox protein 5                                          | Lhx5             | NM_008499   | transcription regulator/nuclear protein | 0.71                | 28                   | 1045   | 37     |
| 3   | transformation related protein 73                               | p73              | AK014503    | transcription regulator/nuclear protein | 0.76                | 26                   | 3882   | 150    |
| 4   | zinc finger protein of the cerebellum 1                         | Zic1             | BB361162    | transcription regulator/nuclear protein | 0.95                | 11                   | 4464   | 418    |
| 5   | leucine, glutamic acid, lysine family 1 protein                 | Lek1             | BB049243    | transcription regulator/nuclear protein | 2.1                 | 9.9                  | 6033   | 610    |
| 6   | nuclear receptor subfamily 2, group F, member 2                 | Nr2f2            | U07635      | transcription regulator/nuclear protein | 0.64                | 8.2                  | 2110   | 256    |
| 7   | DNA methyltransferase 3A                                        | Dnmt3a           | BB044612    | transcription regulator/nuclear protein | 1.4                 | 6.0                  | 2084   | 345    |
| 8   | peroxisome proliferative activated receptor, gamma, coactivator | Ppargc1          | BB745167    | transcription regulator/nuclear protein | 4.5                 | 6.0                  | 1203   | 201    |
| 9   | poly(rC) binding protein 3                                      | Pcbp3            | NM_021568   | transcription regulator/nuclear protein | 1.2                 | 5.8                  | 1986   | 340    |
| 10  | RNA binding motif, single stranded interacting protein 1        | Rbms1            | AW541585    | transcription regulator/nuclear protein | 3.0                 | 5.5                  | 2704   | 488    |
| 11  | bruno-like 4, RNA binding protein                               | Bruno4           | BB748921    | transcription regulator/nuclear protein | 1.6                 | 5.2                  | 2439   | 467    |
| 12  | growth differentiation factor 5                                 | Gdf5             | NM_008109   | extracellular signaling molecule        | 20                  | 91                   | 3253   | 36     |
| 13  | carbonic anhydrase 10                                           | Car10            | BC017606    | extracellular signaling molecule        | 15                  | 61                   | 2159   | 35     |
| 14  | acetylcholinesterase                                            | Ache             | NM_009599   | extracellular signaling molecule        | 93                  | 60                   | 2010   | 33     |
| 15  | chemokine (C-X-C motif) ligand 12                               | Cxcl12           | BC006640    | extracellular signaling molecule        | 26                  | 41                   | 12676  | 311    |
| 16  | nephronectin                                                    | Npnt             | AA223007    | extracellular signaling molecule        | 29                  | 24                   | 2253   | 94     |
| 17  | reelin                                                          | Reln             | NM_011261   | extracellular signaling molecule        | 0.90                | 16                   | 15546  | 979    |
| 18  | prepronociceptin                                                | Pnoc             | D50055      | extracellular signaling molecule        | 66                  | 13                   | 1188   | 91     |
| 19  | nephrilysin (enkephalinase)                                     | Nep              | AV174022    | extracellular signaling molecule        | 22                  | 12                   | 1266   | 104    |
| 20  | protein related to DAN and cerberus                             | Prdc             | NM_011825   | extracellular signaling molecule        | 9.2                 | 11                   | 2765   | 241    |
| 21  | melanoma inhibitory activity                                    | Mia              | NM_019394   | extracellular signaling molecule        | 5.1                 | 9.1                  | 1367   | 150    |
| 22  | tuftelin 1                                                      | Tuft1            | NM_011656   | extracellular signaling molecule        | 3.2                 | 8.6                  | 1702   | 199    |
| 23  | growth arrest specific 6                                        | Gas6             | NM_019521   | extracellular signaling molecule        | 2.6                 | 7.9                  | 2859   | 364    |
| 24  | GTL2, imprinted maternally expressed untranslated mRNA          | Gtl2             | Y13832      | extracellular signaling molecule        | 2.6                 | 6.9                  | 6959   | 1006   |
| 25  | olfactomedin 1                                                  | Olfm1            | D78264      | extracellular signaling molecule        | 1.1                 | 6.7                  | 5882   | 884    |
| 26  | procollagen, type VI, alpha 2                                   | Col6a2           | BI455189    | extracellular signaling molecule        | 8.5                 | 6.5                  | 2825   | 432    |
| 27  | testis expressed gene 264                                       | Tex264           | BC002248    | extracellular signaling molecule        | 1.2                 | 6.3                  | 2724   | 431    |
| 28  | EGF-like repeats and discordin I-like domains 3                 | Edil3            | BB377340    | extracellular signaling molecule        | 2.4                 | 5.8                  | 2480   | 426    |
| 29  | platelet derived growth factor, alpha                           | Pdgfa            | NM_008808   | extracellular signaling molecule        | 2.5                 | 5.7                  | 1407   | 247    |
| 30  | carbonic anhydrase 11                                           | Car11            | BC019393    | extracellular signaling molecule        | 3.5                 | 5.5                  | 1216   | 223    |
| 31  | programmed cell death 1 ligand 1                                | PD-L1            | NM_021893   | receptor/channel/transmembrane protein  | 25                  | 237                  | 1892   | 8      |
| 32  | contactin associated protein-like 2                             | Cntnap2          | BE651445    | receptor/channel/transmembrane protein  | 2.6                 | 28                   | 5653   | 200    |
| 33  | calcium channel, voltage-dependent, alpha 2/delta subunit 2     | Cacna2d2         | AF247139    | receptor/channel/transmembrane protein  | 0.91                | 19                   | 7894   | 410    |
| 34  | purinergic receptor P2X, ligand-gated ion channel, 5            | P2x5             | NM_033321   | receptor/channel/transmembrane protein  | 4.3                 | 18                   | 1906   | 104    |
| 35  | receptor (calcitonin) activity modifying protein 1              | Ramp1            | NM_016894   | receptor/channel/transmembrane protein  | 32                  | 16                   | 6234   | 395    |
| 36  | protein tyrosine phosphatase, receptor type, N                  | Ptprn            | NM_008985   | receptor/channel/transmembrane protein  | 3.4                 | 13                   | 1710   | 128    |
| 37  | unc-5 homolog 2                                                 | Unc5h2           | BG065285    | receptor/channel/transmembrane protein  | 1.0                 | 12                   | 3237   | 280    |
| 38  | thymus cell antigen 1, theta                                    | Thy-1            | AV028402    | receptor/channel/transmembrane protein  | 27                  | 10                   | 3087   | 299    |
| 39  | plexin D1                                                       | Plxnd1           | BC019530    | receptor/channel/transmembrane protein  | 0.88                | 9.7                  | 2164   | 224    |
| 40  | chemokine (C-X-C motif) receptor 4                              | Cxcr4            | D87747      | receptor/channel/transmembrane protein  | 0.98                | 8.7                  | 1014   | 117    |
| 41  | calcium channel, voltage dependent, alpha 2/delta subunit 3     | Cacna2d3         | NM_009785   | receptor/channel/transmembrane protein  | 0.98                | 7.8                  | 2052   | 264    |
| 42  | calyntenin 2                                                    | Clstn2           | NM_022319   | receptor/channel/transmembrane protein  | 3.7                 | 7.6                  | 1851   | 244    |
| 43  | reticulon 4 receptor                                            | Rtn4r            | NM_022982   | receptor/channel/transmembrane protein  | 2.0                 | 6.8                  | 1431   | 209    |
| 44  | CD47 antigen                                                    | Cd47             | BQ256022    | receptor/channel/transmembrane protein  | 7.3                 | 6.7                  | 3811   | 569    |
| 45  | calcium channel, voltage-dependent, alpha 2/delta subunit 1     | Cacna2d1         | NM_009784   | receptor/channel/transmembrane protein  | 1.9                 | 6.6                  | 1709   | 257    |
| 46  | Eph receptor B6                                                 | Ephb6            | NM_007680   | receptor/channel/transmembrane protein  | 3.8                 | 6.6                  | 1678   | 255    |
| 47  | kit oncogene                                                    | Kit              | X65997      | receptor/channel/transmembrane protein  | 1.5                 | 6.3                  | 1700   | 271    |
| 48  | cadherin 4                                                      | Cdh4             | NM_009867   | receptor/channel/transmembrane protein  | 1.6                 | 5.4                  | 2118   | 391    |
| 49  | crystallin, alpha B                                             | Cryab            | AV016515    | trafficking/organelle protein           | 351                 | 23                   | 2249   | 98     |
| 50  | sialyltransferase 9                                             | Siat9            | BB829192    | trafficking/organelle protein           | 2.6                 | 12                   | 2391   | 197    |
| 51  | vesicular glutamate transporter 2                               | Vglut2           | NM_080853   | trafficking/organelle protein           | 2.2                 | 8.7                  | 3390   | 391    |
| 52  | ATPase, H+ transporting, V1 subunit G isoform 2                 | Atp6v1g2         | BC020190    | trafficking/organelle protein           | 9.7                 | 7.1                  | 2930   | 410    |
| 53  | CDP-diacylglycerol synthase 2                                   | Cds2             | BB027654    | trafficking/organelle protein           | 1.0                 | 7.0                  | 4421   | 635    |
| 54  | dystrobrevin binding protein 1                                  | Dtnbp1           | AK017400    | trafficking/organelle protein           | 2.3                 | 5.2                  | 2302   | 447    |
| 55  | SEC24 related gene family, member D                             | Sec24d           | AK009425    | trafficking/organelle protein           | 7.2                 | 5.1                  | 1985   | 392    |
| 56  | ankyrin repeat domain 3                                         | Ankrd3           | AF302127    | intracellular signaling molecule        | 14                  | 269                  | 2155   | 8      |
| 57  | mab-21-like 1                                                   | Mab2111          | AF228913    | intracellular signaling molecule        | 0.80                | 112                  | 1027   | 9      |
| 58  | down syndrome critical region gene 1-like 1                     | Dscr111          | AB061524    | intracellular signaling molecule        | 0.78                | 39                   | 5763   | 150    |
| 59  | calretinin                                                      | Calr             | BC017646    | intracellular signaling molecule        | 1.8                 | 26                   | 9035   | 349    |
| 60  | Purkinje cell protein 4                                         | Pcp4             | NM_008791   | intracellular signaling molecule        | 5.8                 | 14                   | 8716   | 608    |
| 61  | regulator of G-protein signaling 4                              | Rgs4             | BC003882    | intracellular signaling molecule        | 11                  | 12                   | 5189   | 427    |
| 62  | Ras-like without CAAX 2                                         | Rit2             | NM_009065   | intracellular signaling molecule        | 9.1                 | 11                   | 1733   | 156    |
| 63  | phosphoinositol 3-phosphate-binding protein-3 homolog           | Pbp3h            | BI905111    | intracellular signaling molecule        | 3.6                 | 11                   | 2093   | 196    |
| 64  | diablo homolog                                                  | Diablo           | NM_023232   | intracellular signaling molecule        | 4.1                 | 7.3                  | 4509   | 619    |
| 65  | spleen tyrosine kinase                                          | Syk              | NM_011518   | intracellular signaling molecule        | 16                  | 7.2                  | 1070   | 148    |
| 66  | Rho GTPase activating protein 12                                | Arhgap12         | BG064038    | intracellular signaling molecule        | 0.89                | 6.9                  | 1253   | 181    |
| 67  | hippocalcin                                                     | Hpcal            | AK002992    | intracellular signaling molecule        | 6.9                 | 6.4                  | 2342   | 366    |
| 68  | homer homolog 2                                                 | Homer2           | AB017136    | intracellular signaling molecule        | 0.70                | 5.7                  | 3425   | 598    |
| 69  | adenylate cyclase 2                                             | Adcy2            | AV025455    | intracellular signaling molecule        | 1.9                 | 5.3                  | 2725   | 515    |
| 70  | visinin-like 1                                                  | Vsnl1            | AK005091    | intracellular signaling molecule        | 21                  | 5.2                  | 2197   | 422    |
| 71  | unc119 homolog                                                  | Unc119           | BC001990    | intracellular signaling molecule        | 1.7                 | 7.6                  | 3413   | 447    |
| 72  | desmoplakin                                                     | Dsp              | AV297961    | cytoskeletal protein                    | 0.70                | 16                   | 1746   | 110    |
| 73  | synapsin II                                                     | Syn2             | NM_013681   | cytoskeletal protein                    | 6.5                 | 9.6                  | 4030   | 421    |
| 74  | dynammin                                                        | Dnm              | L31397      | cytoskeletal protein                    | 5.0                 | 7.2                  | 4581   | 637    |
| 75  | intracisternal A particle-promoted polypeptide homolog          | Ipph             | BC011135    | cytoskeletal protein                    | 1.9                 | 7.1                  | 1137   | 160    |
| 76  | microtubule-associated protein 4                                | Mtap4            | BB280360    | cytoskeletal protein                    | 3.7                 | 5.9                  | 2669   | 454    |
| 77  | 3-ketoacyl-CoA thiolase B                                       | Kctb             | BC019882    | metabolism                              | 0.92                | 25                   | 1075   | 42     |
| 78  | galactosidase, beta 1                                           | Glb1             | NM_009752   | metabolism                              | 3.5                 | 9.5                  | 1417   | 149    |
| 79  | 4-aminobutyrate aminotransferase                                | Abat             | BF462185    | metabolism                              | 4.7                 | 7.9                  | 2210   | 280    |
| 80  | enolase 2, gamma neuronal                                       | Eno2             | NM_013509   | metabolism                              | 4.9                 | 5.8                  | 1313   | 225    |
| 81  | phosphofructokinase, platelet                                   | Pfkb             | NM_019703   | metabolism                              | 3.8                 | 5.7                  | 2051   | 357    |
| 82  | glucose phosphate isomerase 1                                   | Gpi1             | NM_008155   | metabolism                              | 3.7                 | 5.1                  | 6737   | 1320   |
| 83  | eukaryotic translation elongation factor 1 alpha 2              | Eef1a2           | NM_007906   | others/undefined                        | 6.5                 | 9.7                  | 7530   | 779    |
| 84  | BM88 antigen                                                    | Bm88a            | BC023032    | others/undefined                        | 3.0                 | 6.8                  | 1543   | 227    |
| 85  | heme binding protein 2                                          | Hebp2            | NM_019487   | others/undefined                        | 2.2                 | 6.6                  | 1431   | 217    |
| 86  | deleted in polyposis 1                                          | Dp1              | BG069654    | others/undefined                        | 3.6                 | 5.8                  | 1440   | 251    |
| 87  | WD repeat domain 8                                              | Wdr8             | BC016120    | others/undefined                        | 0.82                | 5.3                  | 2602   | 494    |

Eighty-seven genes which showed more than 5 times increase in CR cells over non-CR cells at P2 are listed. For other explanations, see Fig. 2.
